# Supplementary material
Source: publisher figshare collection journal article supplement (https://acs.figshare.com/ndownloader/files/24363584)
Supplement: Supplementary file 1 [file 24363584]

## Sheet: Description
Fig 2 and Fig 4.
Full blots shown if they were cropped in the manuscript. AHA-Click-Biotin/TAMRA blots are always shown in full, they were only cropped to exclude experimental information not relevant to the figure.
Blots are shown by figure if they were cropped to exclude lanes
Supplemental Figures - DIBO
Summary of experiments for DIBO
String Information -
Full download of information provided by software in April 2020

## Sheet: Figure 2
	standard and EDTA + dialysis						Anisomycin experiment blot
							Biotin
							TffR

## Sheet: Figure 4
Human blood experiments
anti-biotin
TffR

## Sheet: Supplemental Figures - DIBO
										Incubation with DIBO for various times yields inconsistent results. AHA-tagged lysed whole blood samples were incubated with 10 μM DIBO either overnight (O-N) or for 1 hour following dialysis respectively and compared to no-AHA and labeled-AHA in the presence of anisomycin. (n=2/group, study was discontinued after variability discovered across multiple conditions, technical replicated yielded the…
										Short incubation with DIBO with and without dialysis yields inconsistent results. Lysed whole blood samples tagged with AHA were incubated with 10 μM DIBO for either 1- or 2-hours following dialysis or without dialysis, respectively. There were no significant differences in AHA labeled samples between no-AHA, AHA, and AHA in the presence of anisomycin. (n=2/group, study was discontinued after var…
